# Supplementary material
Source: HighWire-hosted journal article supplement (https://www.cmajopen.ca/highwire/filestream/85272/field_highwire_adjunct_files/4/CMAJOpen-2020-0102-2-at.pdf)
Supplement: CMAJOpen-2020-0102-2-at.pdf [file CMAJOpen-2020-0102-2-at.pdf]

**Supplement 2 - Burnout and Preferences for Primary Care reform, by Model of Practice**

| Characteristic N(%)                                                            | Full-time<br>CBPC <sup>2</sup><br>N=112<br>(21.3%) | Mostly CBPC<br>N=141<br>(26.9%) | Mostly other<br>work N=102<br>(19.4%) | Full-time<br>hospital/<br>facility<br>N=97<br>(18.5%) | Locum<br>N=73<br>(13.9%) | Total<br>N=525 | P-value           |
|--------------------------------------------------------------------------------|----------------------------------------------------|---------------------------------|---------------------------------------|-------------------------------------------------------|--------------------------|----------------|-------------------|
| High level of burnout (N=525) <sup>1</sup>                                     | 48 (42.86)                                         | 71 (50.35)                      | 47 (46.08)                            | 32 (32.99)                                            | 25 (34.25)               | 223 (42.48)    | <b>0.045</b>      |
| <b>Reforms (N=525)</b>                                                         |                                                    |                                 |                                       |                                                       |                          |                |                   |
| Primary care reform is needed                                                  | 84 (75.00)                                         | 111 (79.86)                     | 76 (80.85)                            | 72 (74.23)                                            | 56 (78.87)               | 399 (77.78)    | 0.682             |
| An alternative payment model would make it easier to provide longitudinal care | 38 (33.93)                                         | 73 (52.52)                      | 63 (67.02)                            | 41 (42.27)                                            | 38 (53.52)               | 253 (49.32)    | <b>&lt;0.0001</b> |
| I would prefer to be an employee of a clinic (not a small business)            | 32 (28.57)                                         | 68 (48.92)                      | 60 (63.83)                            | 50 (51.55)                                            | 34 (47.89)               | 244 (47.56)    | <b>&lt;0.0001</b> |
| <b>Specific Reform Priorities (N=513)</b>                                      |                                                    |                                 |                                       |                                                       |                          |                |                   |
| <i>Payment Structure</i>                                                       |                                                    |                                 |                                       |                                                       |                          |                |                   |
| Alternative forms of physician payment                                         | 36 (32.14)                                         | 66 (47.48)                      | 60 (63.83)                            | 51 (52.58)                                            | 32 (45.07)               | 245 (47.76)    | <b>&lt;0.0001</b> |
| Direct funding for team roles                                                  | 64 (57.14)                                         | 96 (69.06)                      | 71 (75.53)                            | 68 (70.10)                                            | 43 (60.56)               | 342 (66.67)    | <b>0.041</b>      |
| Direct clinic funding                                                          | 65 (58.04)                                         | 85 (61.15)                      | 57 (60.64)                            | 63 (64.95)                                            | 37 (52.11)               | 307 (59.84)    | 0.542             |
| <i>Work Structure</i>                                                          |                                                    |                                 |                                       |                                                       |                          |                |                   |
| Option to practice in a team                                                   | 65 (58.04)                                         | 100 (71.94)                     | 73 (77.66)                            | 72 (74.23)                                            | 47 (66.2)                | 357 (69.59)    | <b>0.020</b>      |
| Time-limited commitment to patient panel                                       | 22 (19.64)                                         | 27 (19.42)                      | 27 (28.72)                            | 24 (24.74)                                            | 20 (28.17)               | 120 (23.39)    | 0.332             |
| Transparent evaluation of transformation initiatives                           | 61 (54.46)                                         | 87 (62.59)                      | 67 (71.28)                            | 58 (59.79)                                            | 38 (53.52)               | 311 (60.62)    | 0.091             |
| Option to work part-time                                                       | 53 (47.32)                                         | 99 (71.22)                      | 65 (69.15)                            | 62 (63.92)                                            | 53 (74.65)               | 332 (64.72)    | <b>&lt;0.0001</b> |
| <i>Job Benefits</i>                                                            |                                                    |                                 |                                       |                                                       |                          |                |                   |
| Vacation and parental leave                                                    | 89 (79.46)                                         | 115 (82.73)                     | 78 (82.98)                            | 72 (74.23)                                            | 62 (87.32)               | 416 (81.09)    | 0.245             |

|                  |            |            |            |            |            |             |       |
|------------------|------------|------------|------------|------------|------------|-------------|-------|
| Loan forgiveness | 28 (25.00) | 37 (26.62) | 27 (28.72) | 25 (25.77) | 21 (29.58) | 138 (26.90) | 0.952 |
|------------------|------------|------------|------------|------------|------------|-------------|-------|

<sup>1</sup> Defined as feeling burned out at a frequency of once per week or more.(30-31)

<sup>2</sup> CBPC = Community-based Primary Care

## SUPPLEMENTAL FIGURE 2a: Comparison of Report of High Level of Burnout<sup>1</sup>, by Model of Practice

$p=0.045$

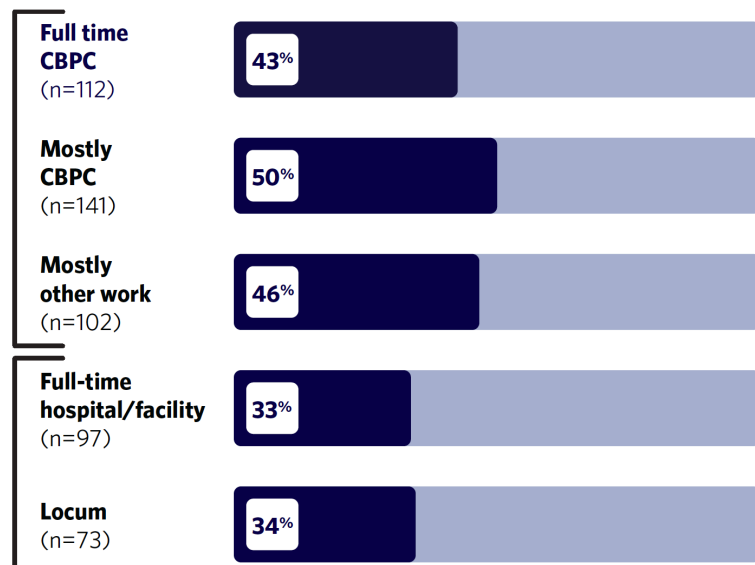

<sup>1</sup> Defined as feeling burned out at a frequency of once per week or more.(30-31)

## SUPPLEMENTAL FIGURE 2b: Comparison of General Opinions regarding primary care reform, by Model of Practice

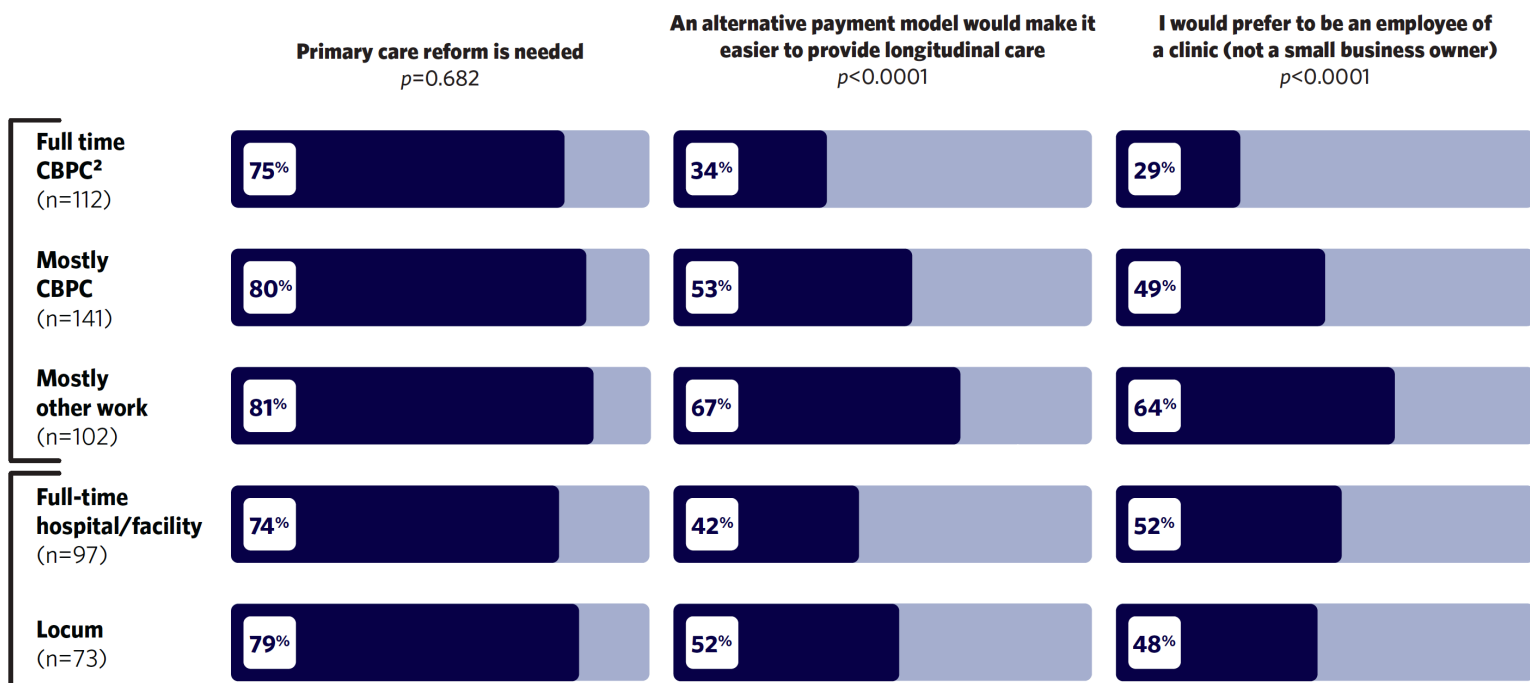

**SUPPLEMENTAL FIGURE 2c:** Comparison of preferences for PAYMENT STRUCTURE reform<sup>1</sup>, by Model of Practice

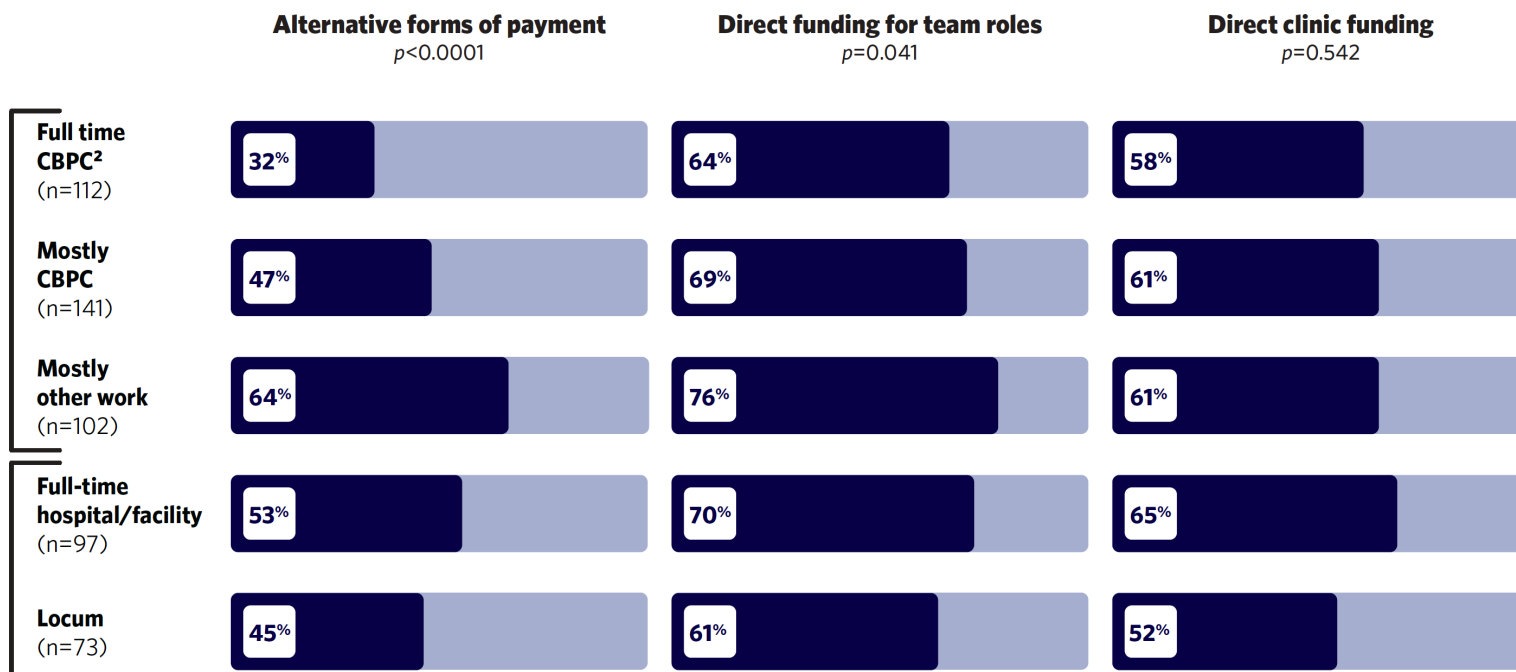

<sup>1</sup>Percentage who reported each priority as very important.

**SUPPLEMENTAL FIGURE 2d:** Comparison of preferences for WORK STRUCTURE reform<sup>1</sup>, by Model of Practice

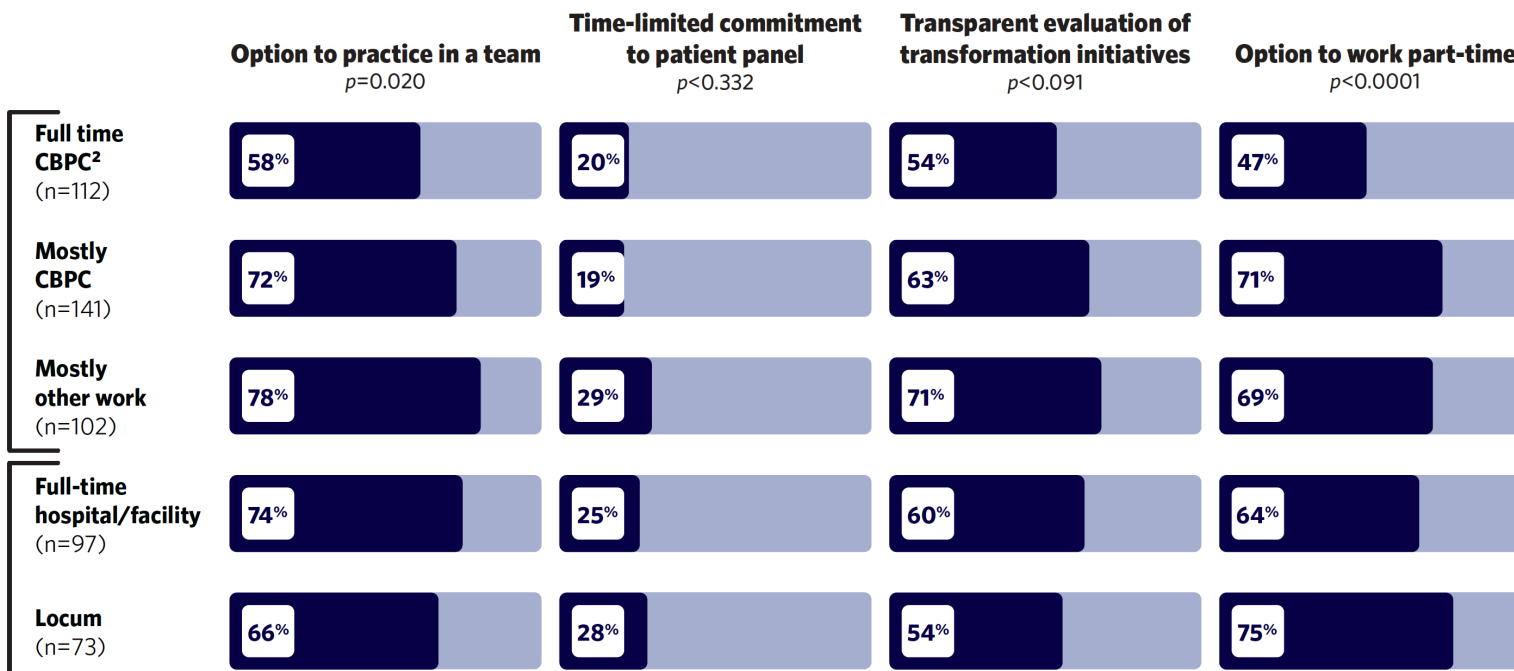

<sup>1</sup>Percentage who reported each priority as very important.

**SUPPLEMENTAL FIGURE 2e:** Comparison of preferences for JOB BENEFITS reform<sup>1</sup>, by Model of Practice

**Vacation and parental leave***p*=0.245**Loan forgiveness***p*=0.952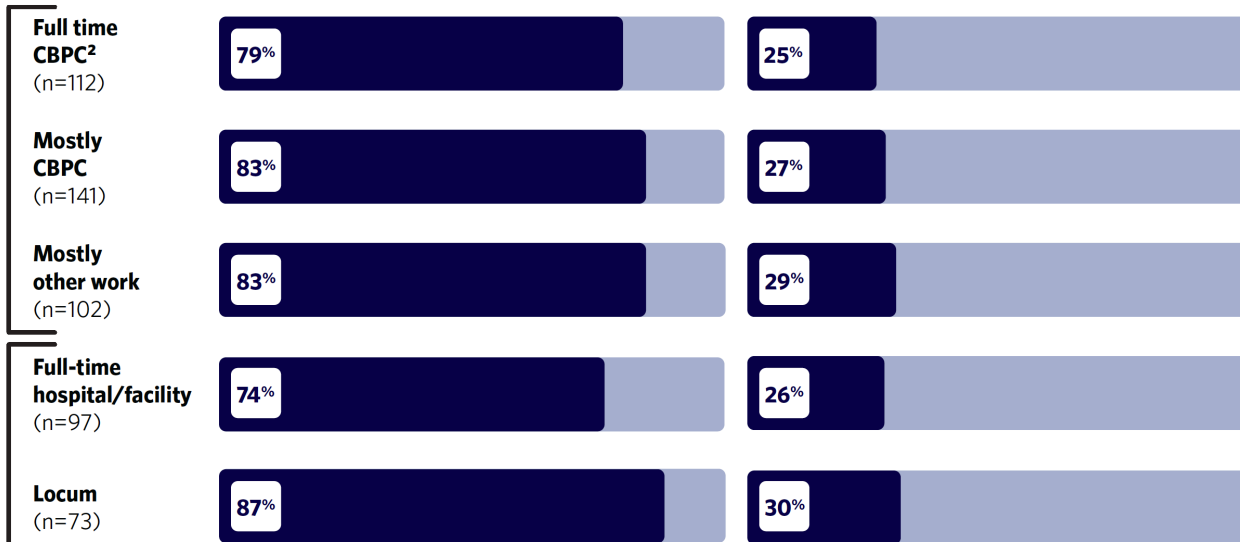

<sup>1</sup>Percentage who reported each priority as very important.
